# Supplementary material
Source: PubMed Central journal article supplement (PMC4968540)
Supplement: AEM.01342-16_zam999117348so1.pdf [file AEM.01342-16_zam999117348so1.pdf]

**Supplementary Information for:**

**Strain and substrate dependent redox mediator and electricity production by**

*Pseudomonas aeruginosa*

Running Titel: *P. aeruginosa* strain variability of current production

Erick M. Bosire, Lars M. Blank, and Miriam A. Rosenbaum#

Institute of Applied Microbiology - iAMB, Aachen Biology and Biotechnology - ABBt,  
RWTH Aachen University, Aachen, Germany.

This supplementary information contains background information on the phenazine  
voltametric and sequence analysis as well as a table with primers used for molecular work.

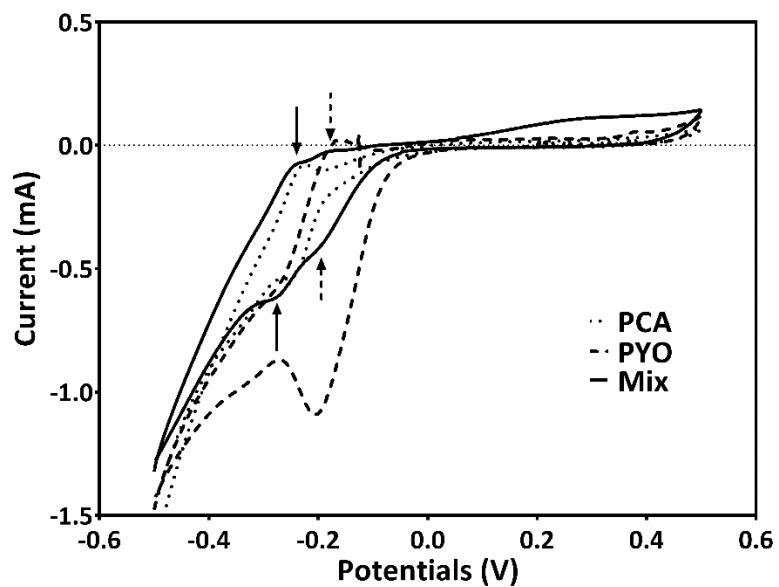

**Figure S1:** Cyclic voltamograms of PCA ( $30 \mu\text{g mL}^{-1}$ ), PYO ( $15 \mu\text{g mL}^{-1}$ ) and their mixture at the same concentrations at pH 6.9. Redox peak systems of PCA (solid arrows) and PYO (dotted arrows) in the mix are shown.

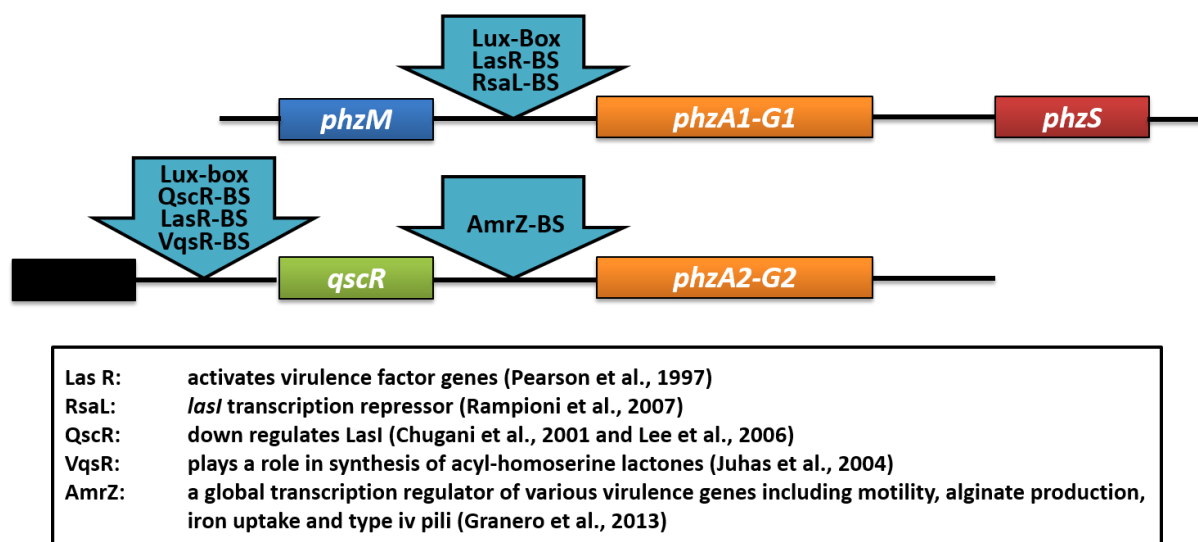

**Figure S2:** Analysis of transcription regulatory elements of the phenazine gene clusters. All indicated transcription regulator bindings sites (BS) have been identified for all three *P. aeruginosa* strains with the following consensus sequences: Lux-Box – ACCTACCAGATCTTGTAGTTGAGCCGGTACGAGCGTTCTGTGTTTTATGCAATCCACATCAGCGACC AGGGATGCTGGCTATTTGAAACACTTCACGGAATGACGCTGAAAGTCTTCGCGACCTCGTCTGTCCG CACCTTAACGAAAGCATTGCGAATCCATTACCGACAGGTTTCCAAAAGAAACCCGGGATGAAACTC CTATTGCCTTTCGAAAATTGGAAACGACAGGCCGAACATATGTAACGCGAAA; LasR-BS – ACCTACCAGATCTTGTAGTT; RsaL-BS – TATGCAATCCACATC; QscR-BS (=PhzR-BS) – ACCTGCCCCGGAAGGGCAGGTTGTCCC; VqsR-BS – TCGCCCCGGCGGGCGGCGA; AmrZ-BS – (i) CGAATTGCCATGA, (ii) CAATTCGGCATTGA.

**Table S1. Primers used in this study.**

| <b>Primer name</b>                                      | <b>Sequence 5'→3'</b>                 | <b>Application</b>                               |
|---------------------------------------------------------|---------------------------------------|--------------------------------------------------|
| <b>PA14<math>\Delta</math>phz knockout generation</b>   |                                       |                                                  |
| Op1_left_for                                            | gaattcgagctcggtacGCCTGTCCAAGCTGTACC   | Knockout PA14<br><i>phzA1-G1,S,M</i>             |
| Op1_left_rev                                            | cgatccgctCGACCGAAGACTGAGAAGAG         |                                                  |
| Op1_right_for                                           | cttcggtcgAGCGGATCGTCGACCTG            |                                                  |
| Op1_right_rev                                           | gtcgactctagagatccCGGCTTCATCGGTTTCTTCG |                                                  |
| Op2_left_for                                            | gaattcgagctcggtacATGCATATCCCGCCCGAG   | Knockout PA14<br><i>phzA2-G2</i>                 |
| Op2_left_rev                                            | ttgaaagggTTGGAGCCCATCCAACCG           |                                                  |
| Op2_right_for                                           | ggctccaaCCCTTTCAACCGTTGGTACTCTC       |                                                  |
| Op2_right_rev                                           | gtcgactctagagatccCGGTGGGCAAGACCTACG   |                                                  |
| pEMG_for                                                | CGGGCCTCTTCGCTATTAC                   | Confirmation of<br>cointegration and<br>knockout |
| pEMG_rev                                                | TTATGCTTCCGGCTCGTATG                  |                                                  |
| Op1_Gen_L_for                                           | AAGGTCAACGCGGTACAG                    |                                                  |
| Op1_Gen_R_rev                                           | CACCGCCGAACCTCTATCC                   |                                                  |
| Op1_KO_rev                                              | GCGCGAATACGAAGAAGC                    |                                                  |
| Op2_Gen_L_for                                           | CGCATCGACGATATGAAACG                  |                                                  |
| Op2_Gen_R_rev                                           | CGTCCCGGAAAGCAATGTG                   |                                                  |
| Op2_KO_rev                                              | AGATTCCCTACGGGCAGCAG                  |                                                  |
| <b>Strain KRP1 Sequencing of phenazine gene regions</b> |                                       |                                                  |
| OP1-1 (for)                                             | TGCCCGGTGTTGCTAGCG                    | KRP1: phz operon 1<br>and 2 PCR<br>amplification |
| OP1-2 (rev)                                             | TCGGCAGGTCGACGATCC                    |                                                  |
| OP2-1 (for)                                             | TCGTCTGGCGCGAATTCTG                   |                                                  |
| OP2-2 (rev)                                             | GAGAGCCGTTCTACGGTTTCC                 |                                                  |
| OP1-1-S1                                                | TTCCACCTGGTTGCGGTAG                   | KRP1: phz operon 1<br>sequencing                 |
| OP1-882-S2                                              | GCAGGATCATCTGCAGTTC                   |                                                  |
| OP1-1861-S3                                             | GGCCGTTGAGGATGATCTG                   |                                                  |
| OP1-2618-S4                                             | GGTAGACCTCGATGGGAAAG                  |                                                  |
| OP1-3610-S5                                             | GGCGATCATCGAGGTGAAG                   |                                                  |
| OP1-4451-S6                                             | AGCAACTGGCGGAAGAAAC                   |                                                  |
| OP1-5453-S7                                             | GGAAGTAGCGCTGCATGTC                   |                                                  |
| OP1-6326-S8                                             | CGCATAGCCCTTGAGAATC                   |                                                  |
| OP1-7219-S9                                             | GTCCTGGCCTTTGGTATTC                   |                                                  |
| OP1-8052-S10                                            | TGGAAACCTGTCGGTAATGG                  |                                                  |
| OP1-8916-S11                                            | TCGGCGAAGACTTCTACAG                   |                                                  |
| OP2-1-S1                                                | TCGTCTGGCGCGAATTCTG                   | KRP1: phz Operon 2<br>sequencing                 |
| OP2-940-S2                                              | GTGAGGGACTCGGAAATG                    |                                                  |
| OP2-1701-S3                                             | TCTCCGACAGGTTTCATCTC                  |                                                  |
| OP2-2624-S4                                             | ATCGGAGTGACGCACGATG                   |                                                  |
| OP2-3518-S5                                             | GATCTGCCGGTAGGGAATC                   |                                                  |
| OP2-4449-S6                                             | ATCGCAGAGGCTGGTGTAG                   |                                                  |
| OP2-5333-S7                                             | CGTTCTCGGCATGGTGGTC                   |                                                  |
| OP2-6334-S8                                             | CTCGAAGATCCGCACGTTG                   |                                                  |
| OP2-7244-S9                                             | CTTGAGCATCTCGGTTTCC                   |                                                  |

**Table S2. DNA sequence identity (in %) of the phenazine genes in a pair-wise comparison of the three *P. aeruginosa* strains. The number in the bracket indicates the number of nucleotide miss-matches.**

| Gene         | PA14-PAO1    | PA14-KRP1                                           | PAO1-KRP1                                                |
|--------------|--------------|-----------------------------------------------------|----------------------------------------------------------|
| <i>phzA1</i> | 98.98%, (5)  | 98.98%, (5)                                         | 100%                                                     |
| <i>phzB1</i> | 98.36%, (8)  | 99.18%, (4)                                         | 98.77%, (6)                                              |
| <i>phzC1</i> | 99.26%, (9)  | 98.85%, (14)                                        | 98.61%, (17)                                             |
| <i>phzD1</i> | 99.36%, (4)  | 99.84%, (2)                                         | 98.87%, (7)                                              |
| <i>phzE1</i> | 99.15%, (16) | 99.30%, (13)                                        | 99.42%, (11)                                             |
| <i>phzF1</i> | 99.52%, (4)  | 99.16%, (7)                                         | 99.40%, (5)                                              |
| <i>phzG1</i> | 99.38%, (4)  | 99.54%, (3)                                         | 99.84%, (1)                                              |
| <i>phzM</i>  | 99.30%, (7)  | 99.40%, (6)                                         | 99.70%, (3)                                              |
| <i>phzS</i>  | 98.10%, (23) | 98.18%, (22)                                        | 99.59%, (5)                                              |
| <i>phzA2</i> | 98.98%, (5)  | 99.59%, (2)                                         | 98.98%, (5)                                              |
| <i>phzB2</i> | 99.18%, (4)  | 99.59%, (2)                                         | 99.59%, (2)                                              |
| <i>phzC2</i> | 99.43%, (7)  | 98.77%, (15)<br>(88.92% with 120n gap) <sup>a</sup> | 98.85%, (14),<br>(89.00%, with 120n<br>gap) <sup>a</sup> |
| <i>phzD2</i> | 99.20%, (5)  | 99.68%, (2)                                         | 98.88%, (7)                                              |
| <i>phzE2</i> | 98.99%, (19) | 99.15%, (16)                                        | 99.42%, (11)                                             |
| <i>phzF2</i> | 99.52%, (4)  | 99.16%, (7)                                         | 99.40%, (5)                                              |
| <i>phzG2</i> | 99.23%, (5)  | 99.38%, (4)                                         | 99.85%, (1)                                              |

<sup>a</sup> The obtained sequences for *phzC2* from KRP1 contained a 120 nucleotide gap. It is not clear yet, if this is due to difficulties in sequencing for this area or if the gene contains a 120bp deletion.

## References:

- Pearson JP, Pesci EC and Iglewski BH. 1997. Roles of *Pseudomonas aeruginosa* las and rhl quorum-sensing systems in control of elastase and rhamnolipid biosynthesis genes. *Journal of Bacteriology*. 179(18): 5756-5767.
- Rampioni G, Schuster M, Greenberg EP, Bertani I, Grasso M, Venturi V, Zennaro E, Leoni L. 2007. RsaL provides quorum sensing homeostasis and functions as a global regulator of gene expression in *Pseudomonas aeruginosa*. *Molecular Microbiology*. 66(6): 1557-65.
- Chugani SA, Whiteley M, Lee KM, D'Argenio D, Manoil C, et al. 2001. QscR, a modulator of quorum-sensing signal synthesis and virulence in *Pseudomonas aeruginosa*. *Proc. Natl. Acad. Sci. USA* 98:2752-57.

Lee JH, Lequette Y, Greenberg EP. 2006. Activity of purified QscR, a *Pseudomonas aeruginosa* orphan quorum-sensing transcription factor. *Molecular Microbiology*. 59:602–9.

Juhas M, Wiehlmann L, Huber B, Jordan D, Lauber J, et al. 2004. Global regulation of quorum sensing and virulence by VqsR in *Pseudomonas aeruginosa*. *Microbiology* 150:831–41.

Granero FM, Nieto MR, Vesga P, Martin M and Rivilla R. 2013. AmrZ is a global transcriptional regulator implicated in iron uptake and environmental adaption in *P. fluorescens*F113. *BMC genomics*. 15: 237.
